# Supplementary material for: High Level Expression of MHC-II in HPV+ Head and Neck Cancers Suggests that Tumor Epithelial Cells Serve an Important Role as Accessory Antigen Presenting Cells
Source: MDPI journal article supplement (doi:10.3390/cancers11081129), 2019-08-07
Supplement: s1 [file s1]

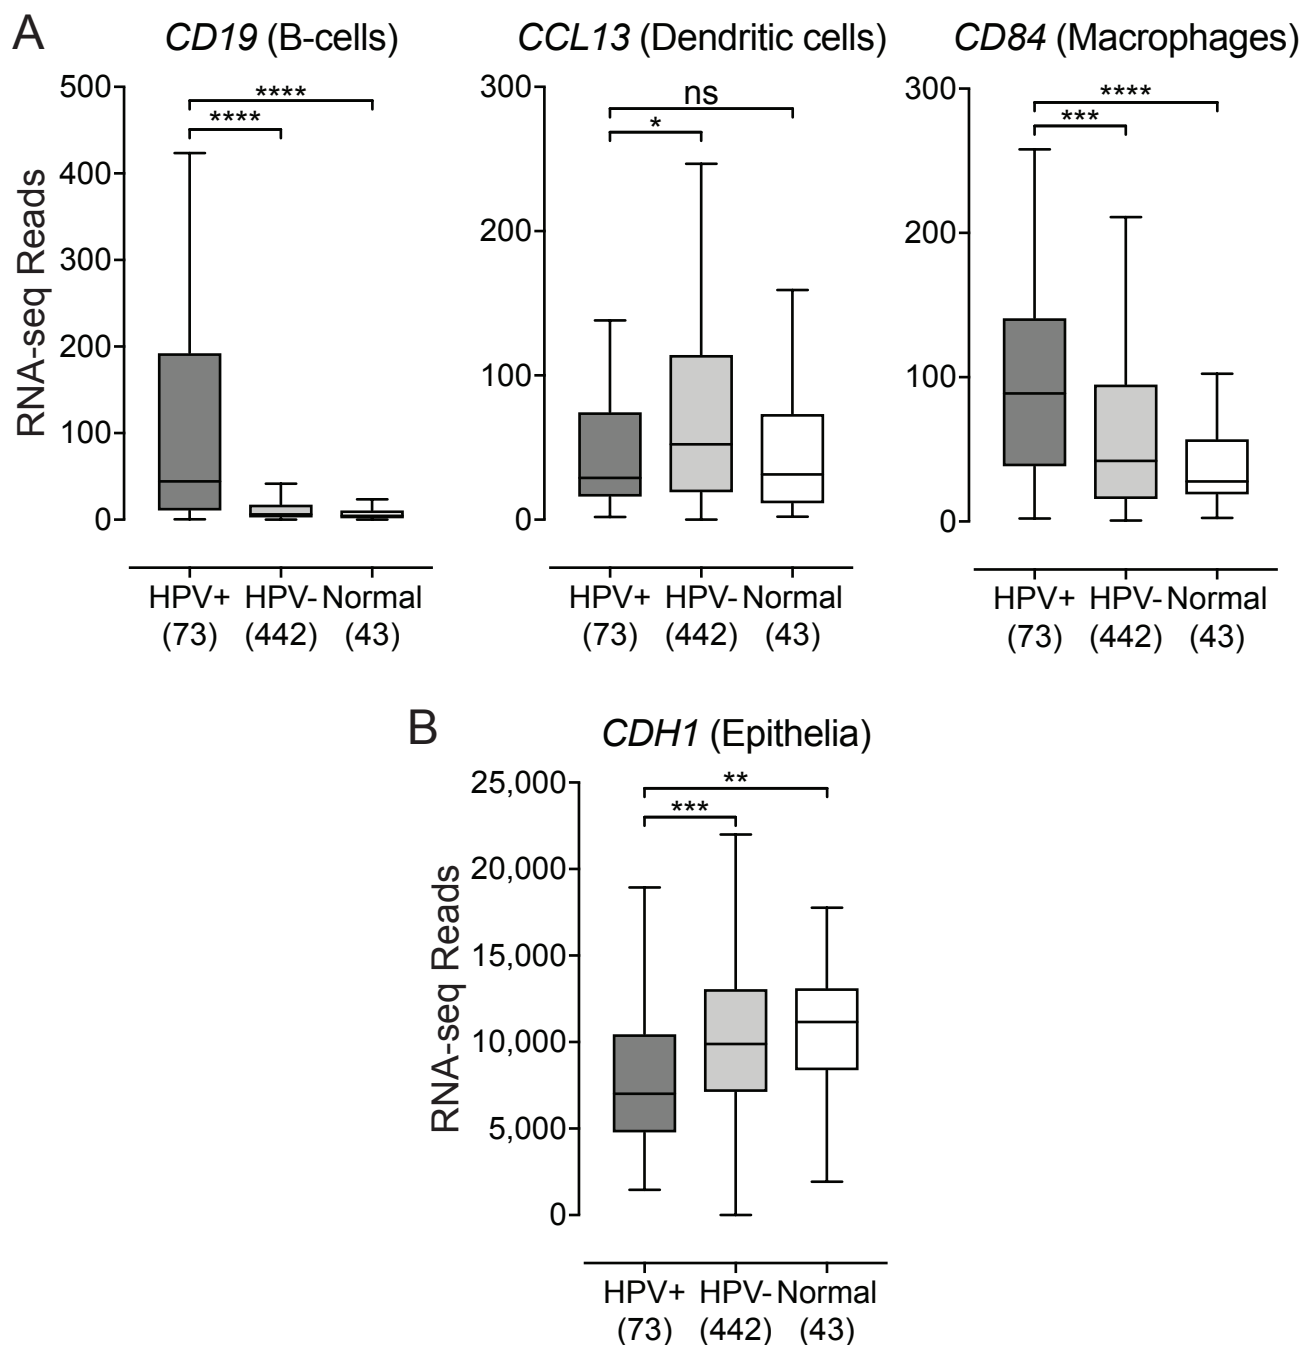

**Figure S2:** Gene expression comparisons of **(A)** APC and **(B)** Epithelia markers. RSEM normalized RNA-seq data for genes shown above was extracted from the TCGA database for the HNSC cohort for HPV+, HPV-, and normal control tissues. Statistical analysis was performed using a two-tailed non-parametric Mann-Whitney U test. Numbers in brackets refer to the number of samples included in each analysis. \*  $p \leq 0.05$ , \*\*  $p \leq 0.01$ , \*\*\*  $p \leq 0.001$ , \*\*\*\*  $p \leq 0.0001$ , ns - not significant
